# Supplementary material for: Application of Four Genotyping Methods to Mycoplasma bovis Isolates Derived from Western Canadian Feedlot Cattle
Source: PubMed Central journal article supplement (PMC8218767; doi:10.1128/jcm.00044-21), 2021-06-18
Supplement: jcm.00044-21-s0001.pdf [file jcm.00044-21-s0001.pdf]

1 **Table S1** Isolate Data

2 Isolates previously submitted to pubMLST under a separate isolate ID are identified by that ID  
 3 within the Alternate pubMLST ID and Notes column. Isolates with an Unknown ST have their  
 4 missing allele(s) identified in this column, in addition to the five isolates that originate from the  
 5 USA.

| Sequence Type | Alternate pubMLST ID and Notes | ID       | Year | Feedlot | Anatomical Location | Health Status | Host ID |
|---------------|--------------------------------|----------|------|---------|---------------------|---------------|---------|
| 2             | MJ259                          | MPLM0042 | 2016 | N       | joint               | dead          | 16      |
| 2             |                                | MPLM0632 | 2007 | K       | nasopharynx         | dead          | 83      |
| 2             |                                | MPLM0644 | 2007 | Q       | nasopharynx         | diseased      | 42      |
| 14            | USA Isolate                    | MPLM0833 | 2017 | E       | nasopharynx         | healthy       | 31      |
| 21            | MJ260                          | MPLM0054 | 2017 | O       | lung                | dead          | 70      |
| 21            | MJ287                          | MPLM0154 | 2017 | N       | lung                | dead          | 67      |
| 21            |                                | MPLM0645 | 2007 | Q       | nasopharynx         | diseased      | 56      |
| 21            |                                | MPLM0648 | 2006 | J       | nasopharynx         | diseased      | 73      |
| 21            |                                | MPLM0662 | 2007 | Q       | nasopharynx         | diseased      | 51      |
| 21            |                                | MPLM0698 | 2007 | Q       | nasopharynx         | healthy       | 59      |
| 21            |                                | MPLM0706 | 2007 | Q       | nasopharynx         | healthy       | 55      |
| 24            |                                | MPLM0638 | 2015 | I       | joint               | dead          | 88      |
| 24            |                                | MPLM0647 | 2007 | Q       | nasopharynx         | diseased      | 45      |
| 24            |                                | MPLM0657 | 2007 | Q       | nasopharynx         | diseased      | 46      |
| 24            |                                | MPLM0660 | 2007 | Q       | nasopharynx         | diseased      | 40      |
| 24            |                                | MPLM0661 | 2007 | Q       | nasopharynx         | diseased      | 44      |
| 24            |                                | MPLM0664 | 2007 | Q       | nasopharynx         | diseased      | 39      |
| 24            |                                | MPLM0666 | 2007 | Q       | nasopharynx         | diseased      | 57      |
| 24            |                                | MPLM0669 | 2007 | Q       | nasopharynx         | dead          | 43      |
| 24            |                                | MPLM0684 | 2007 | Q       | nasopharynx         | healthy       | 49      |
| 24            |                                | MPLM0692 | 2007 | Q       | nasopharynx         | healthy       | 58      |
| 24            |                                | MPLM0700 | 2007 | Q       | nasopharynx         | healthy       | 52      |
| 24            |                                | MPLM0714 | 2007 | Q       | nasopharynx         | healthy       | 48      |
| 24            |                                | MPLM0715 | 2007 | Q       | nasopharynx         | healthy       | 54      |
| 27            |                                | MPLM0541 | 2018 | N       | lung                | dead          | 90      |
| 27            |                                | MPLM0555 | 2018 | N       | lung                | dead          | 64      |
| 27            |                                | MPLM0556 | 2018 | N       | joint               | dead          | 64      |
| 40            |                                | MPLM0652 | 2007 | Q       | nasopharynx         | diseased      | 50      |

|    |       |          |      |   |             |          |    |
|----|-------|----------|------|---|-------------|----------|----|
| 40 |       | MPLM0665 | 2007 | Q | nasopharynx | diseased | 41 |
| 40 |       | MPLM0667 | 2007 | R | nasopharynx | healthy  | 78 |
| 40 |       | MPLM0668 | 2007 | R | nasopharynx | healthy  | 79 |
| 40 |       | MPLM0713 | 2007 | Q | nasopharynx | healthy  | 47 |
| 42 |       | MPLM0634 | 2015 | M | lung        | dead     | 65 |
| 42 | MJ292 | MPLM0636 | 2014 | S | lung        | dead     | 97 |
| 42 |       | MPLM0640 | 2006 | G | nasopharynx | healthy  | 77 |
| 42 |       | MPLM0642 | 2006 | U | nasopharynx | diseased | 71 |
| 42 |       | MPLM0649 | 2006 | P | nasopharynx | diseased | 74 |
| 42 |       | MPLM0670 | 2007 | R | nasopharynx | healthy  | 75 |
| 42 |       | MPLM0671 | 2007 | R | nasopharynx | healthy  | 76 |
| 43 |       | MPLM0825 | 2018 | C | nasopharynx | healthy  | 26 |
| 44 |       | MPLM0061 | 2017 | O | joint       | dead     | 69 |
| 44 | MJ267 | MPLM0087 | 2017 | N | lung        | dead     | 17 |
| 44 | MJ268 | MPLM0088 | 2017 | N | joint       | dead     | 17 |
| 44 | MJ272 | MPLM0103 | 2017 | N | joint       | dead     | 9  |
| 44 | MJ273 | MPLM0105 | 2017 | N | lung        | dead     | 35 |
| 44 | MJ274 | MPLM0106 | 2017 | N | joint       | dead     | 35 |
| 44 | MJ278 | MPLM0114 | 2017 | N | lung        | dead     | 8  |
| 44 | MJ286 | MPLM0149 | 2017 | N | joint       | dead     | 68 |
| 44 | MJ289 | MPLM0160 | 2017 | N | lung        | dead     | 12 |
| 45 | MJ280 | MPLM0136 | 2017 | S | lung        | dead     | 4  |
| 45 |       | MPLM0815 | 2017 | A | nasopharynx | healthy  | 19 |
| 45 |       | MPLM0827 | 2018 | D | nasopharynx | healthy  | 27 |
| 45 |       | MPLM0828 | 2018 | D | nasopharynx | healthy  | 28 |
| 45 |       | MPLM0832 | 2017 | E | nasopharynx | healthy  | 30 |
| 48 |       | MPLM0646 | 2007 | R | nasopharynx | healthy  | 80 |
| 52 | MJ246 | MPLM0020 | 2016 | T | joint       | dead     | 89 |
| 52 | MJ255 | MPLM0037 | 2016 | T | lung        | dead     | 60 |
| 52 | MJ257 | MPLM0039 | 2016 | T | lung        | dead     | 98 |
| 52 |       | MPLM0631 | 2007 | L | joint       | dead     | 82 |
| 60 | MJ237 | MPLM0009 | 2016 | T | lung        | dead     | 10 |
| 60 | MJ238 | MPLM0010 | 2016 | T | joint       | dead     | 10 |
| 60 | MJ240 | MPLM0012 | 2016 | T | joint       | dead     | 95 |
| 60 | MJ241 | MPLM0013 | 2016 | T | lung        | dead     | 11 |
| 60 | MJ242 | MPLM0014 | 2016 | T | joint       | dead     | 11 |
| 60 |       | MPLM0016 | 2016 | T | joint       | dead     | 62 |
| 60 | MJ244 | MPLM0017 | 2016 | T | lung        | dead     | 61 |
| 60 | MJ245 | MPLM0018 | 2016 | T | joint       | dead     | 61 |
| 60 | MJ249 | MPLM0025 | 2016 | T | lung        | dead     | 3  |
| 60 | MJ250 | MPLM0026 | 2016 | T | joint       | dead     | 3  |
| 60 | MJ253 | MPLM0031 | 2016 | T | lung        | dead     | 2  |

|    |             |          |      |   |             |          |    |
|----|-------------|----------|------|---|-------------|----------|----|
| 60 |             | MPLM0035 | 2016 | T | lung        | dead     | 86 |
| 60 | MJ258       | MPLM0041 | 2016 | N | lung        | dead     | 16 |
| 60 |             | MPLM0157 | 2017 | N | lung        | dead     | 87 |
| 60 |             | MPLM0533 | 2018 | N | lung        | dead     | 7  |
| 60 |             | MPLM0534 | 2018 | N | joint       | dead     | 7  |
| 60 |             | MPLM0538 | 2018 | N | joint       | dead     | 14 |
| 60 |             | MPLM0542 | 2018 | N | joint       | dead     | 90 |
| 60 |             | MPLM0545 | 2018 | N | lung        | dead     | 91 |
| 60 |             | MPLM0546 | 2018 | N | joint       | dead     | 91 |
| 60 |             | MPLM0559 | 2018 | N | lung        | dead     | 93 |
| 60 |             | MPLM0560 | 2018 | N | joint       | dead     | 93 |
| 60 | MJ291       | MPLM0635 | 2014 | H | lung        | dead     | 96 |
| 61 | MJ243       | MPLM0015 | 2016 | T | lung        | dead     | 62 |
| 62 |             | MPLM0703 | 2007 | Q | nasopharynx | healthy  | 53 |
| 65 | MJ235       | MPLM0007 | 2016 | T | lung        | dead     | 63 |
| 65 | MJ236       | MPLM0008 | 2016 | T | joint       | dead     | 63 |
| 65 | MJ239       | MPLM0011 | 2016 | T | lung        | dead     | 95 |
| 65 | MJ247       | MPLM0021 | 2016 | T | lung        | dead     | 6  |
| 65 | MJ248       | MPLM0022 | 2016 | T | joint       | dead     | 6  |
| 65 | MJ251       | MPLM0029 | 2016 | N | lung        | dead     | 1  |
| 65 |             | MPLM0821 | 2017 | B | nasopharynx | healthy  | 22 |
| 66 |             | MPLM0820 | 2017 | A | nasopharynx | healthy  | 21 |
| 66 | USA Isolate | MPLM0838 | 2017 | E | nasopharynx | healthy  | 34 |
| 67 | MJ261       | MPLM0057 | 2017 | O | lung        | dead     | 18 |
| 67 | MJ262       | MPLM0058 | 2017 | O | joint       | dead     | 18 |
| 67 | MJ263       | MPLM0060 | 2017 | O | lung        | dead     | 69 |
| 67 | MJ269       | MPLM0093 | 2017 | N | lung        | dead     | 13 |
| 67 | MJ271       | MPLM0102 | 2017 | N | lung        | dead     | 9  |
| 67 | MJ276       | MPLM0111 | 2017 | N | lung        | dead     | 5  |
| 67 | MJ277       | MPLM0112 | 2017 | N | joint       | dead     | 5  |
| 67 | MJ282       | MPLM0145 | 2017 | N | lung        | dead     | 66 |
| 67 | MJ283       | MPLM0146 | 2017 | N | joint       | dead     | 66 |
| 67 |             | MPLM0155 | 2017 | N | joint       | dead     | 67 |
| 67 | MJ288       | MPLM0158 | 2017 | N | joint       | dead     | 87 |
| 67 |             | MPLM0164 | 2017 | N | joint       | dead     | 36 |
| 70 |             | MP0079   | 2015 | I | lung        | dead     | 88 |
| 70 | MJ290       | MPLM0629 | 2007 | Q | nasopharynx | diseased | 81 |
| 70 | MJ293       | MPLM0637 | 2015 | I | lung        | dead     | 37 |
| 75 |             | MPLM0630 | 2008 | K | joint       | dead     | 84 |
| 76 |             | MP0209   | 2014 | I | joint       | dead     | 85 |
| 76 |             | MP0219   | 2014 | I | lung        | dead     | 85 |

|         |                                                 |          |      |   |             |         |    |
|---------|-------------------------------------------------|----------|------|---|-------------|---------|----|
| 77      | MJ234                                           | MPLM0003 | 2016 | F | lung        | dead    | 94 |
| 77      |                                                 | MPLM0004 | 2016 | F | joint       | dead    | 94 |
| 79      | MJ252                                           | MPLM0030 | 2016 | N | joint       | dead    | 1  |
| 80      |                                                 | MPLM0132 | 2016 | S | lung        | dead    | 38 |
| 80      |                                                 | MPLM0134 | 2016 | S | lung        | dead    | 15 |
| 80      |                                                 | MPLM0135 | 2016 | S | joint       | dead    | 15 |
| 149     |                                                 | MPLM0608 | 2018 | N | lung        | dead    | 92 |
| 150     | USA<br>Isolate                                  | MPLM0830 | 2018 | D | nasopharynx | healthy | 29 |
| 151     |                                                 | MPLM0643 | 2006 | G | nasopharynx | healthy | 72 |
| 152     |                                                 | MPLM0822 | 2017 | B | nasopharynx | healthy | 23 |
| 153     |                                                 | MPLM0823 | 2018 | C | nasopharynx | healthy | 24 |
| 153     |                                                 | MPLM0824 | 2018 | C | nasopharynx | healthy | 25 |
| 154     | USA<br>Isolate                                  | MPLM0834 | 2017 | E | nasopharynx | healthy | 32 |
| 154     | USA<br>Isolate                                  | MPLM0837 | 2017 | E | nasopharynx | healthy | 33 |
| Unknown | Missing<br>dnaA,<br>gltX,<br>gpsA,<br>gyrB, tdk | MPLM0019 | 2016 | T | lung        | dead    | 89 |
| Unknown | MJ254,<br>Missing<br>gpsA                       | MPLM0036 | 2016 | T | joint       | dead    | 86 |
| Unknown | MJ285,<br>Missing<br>gyrB                       | MPLM0148 | 2017 | N | lung        | dead    | 68 |
| Unknown | Missing<br>gpsA,<br>Novel pta2                  | MPLM0817 | 2018 | A | nasopharynx | healthy | 20 |

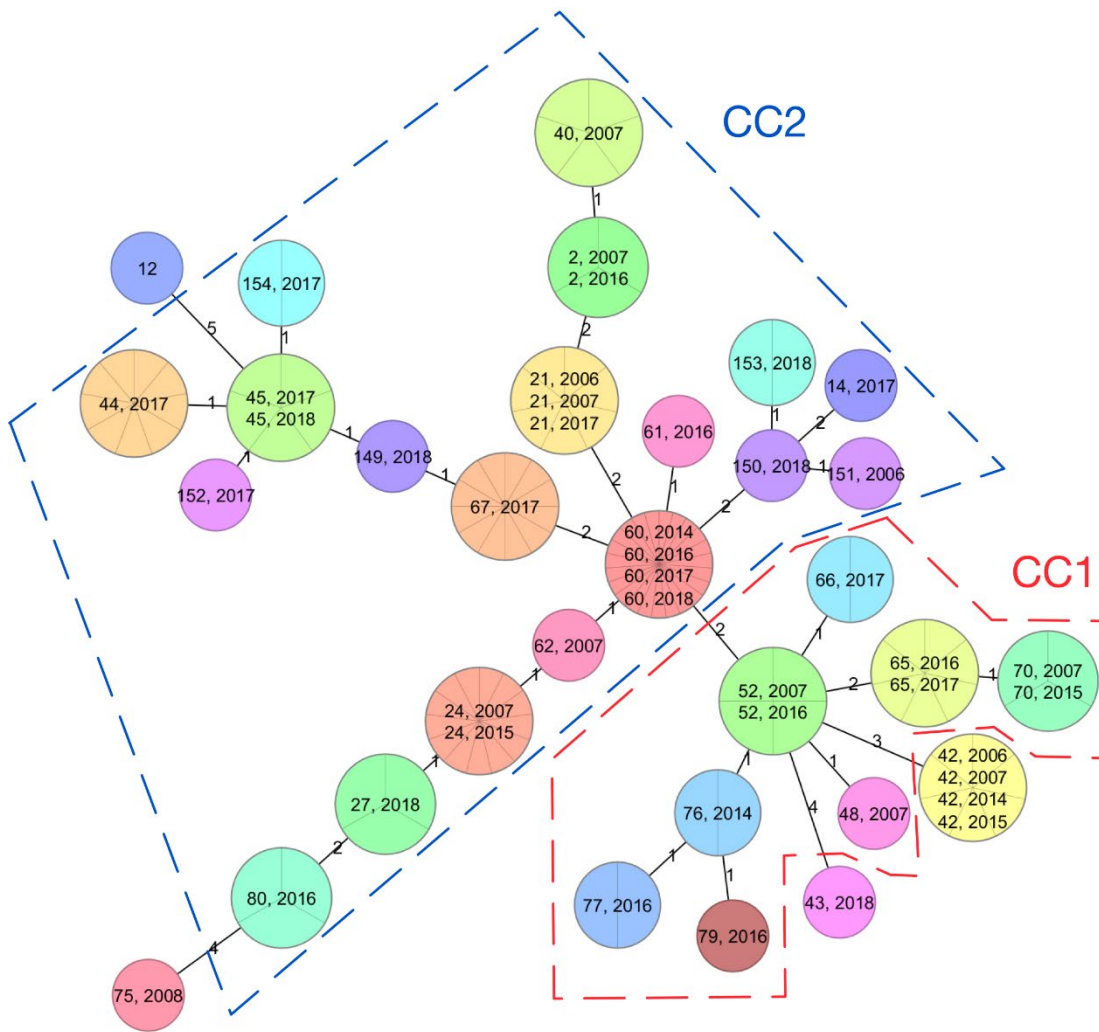

6  
7  
8  
9  
10  
11  
12  
13

**Figure S1** Minimum spanning tree of 126 *Mycoplasma bovis* genomes (125 field isolates plus PG45) typed by MLST. Clonal complexes 1 and 2 are surrounded by red and blue lines, respectively. Sequence types are colour coded with the size of the circle reflecting the number of isolates, with the partitioning lines within a circle delineating isolates with an identical genotype. The number of different alleles is indicated over the line connecting the sequence types. The PG45 reference genome is identified as the singleton with ST12.

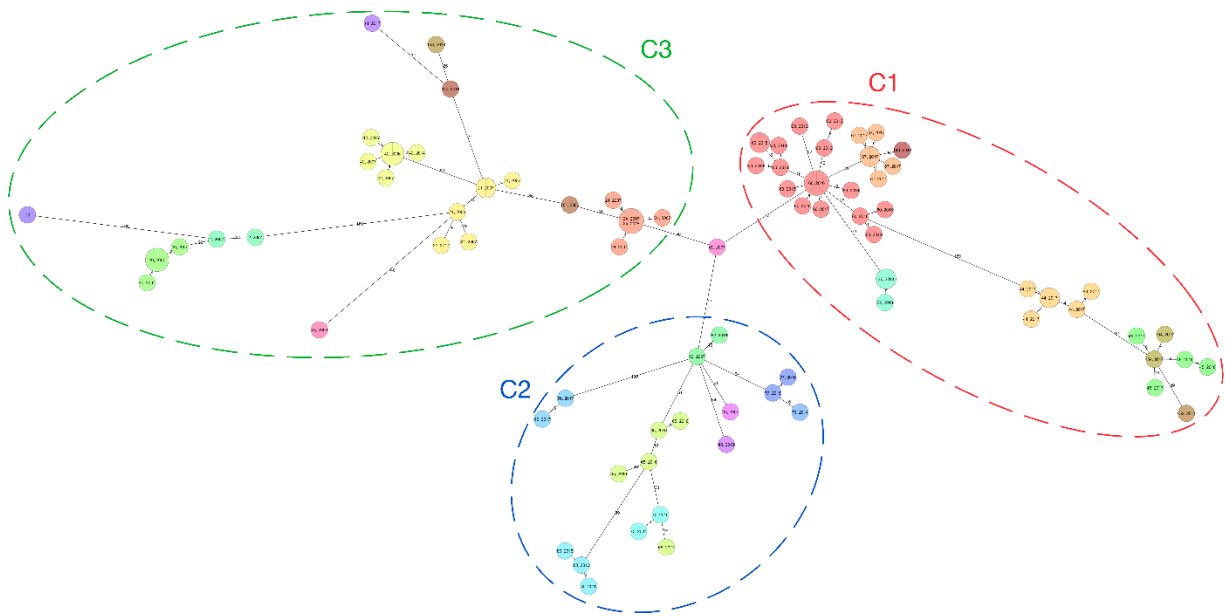

14  
 15 **Figure S2** Minimum spanning tree of 102 *Mycoplasma bovis* isolates (101 field isolates plus  
 16 PG45) created with cgMLST, based on alleles at 296 core genome loci. Clades 1 - 3 are denoted  
 17 by a surrounding circle. The isolates are identified by MLST sequence type and production year  
 18 (ST, Production Year). Sequence types are colour coded with the size of the circle reflecting the  
 19 number of isolates, with the partitioning lines within a circle delineating isolates with an identical  
 20 genotype. The number of different alleles is indicated over the line connecting the sequence types.

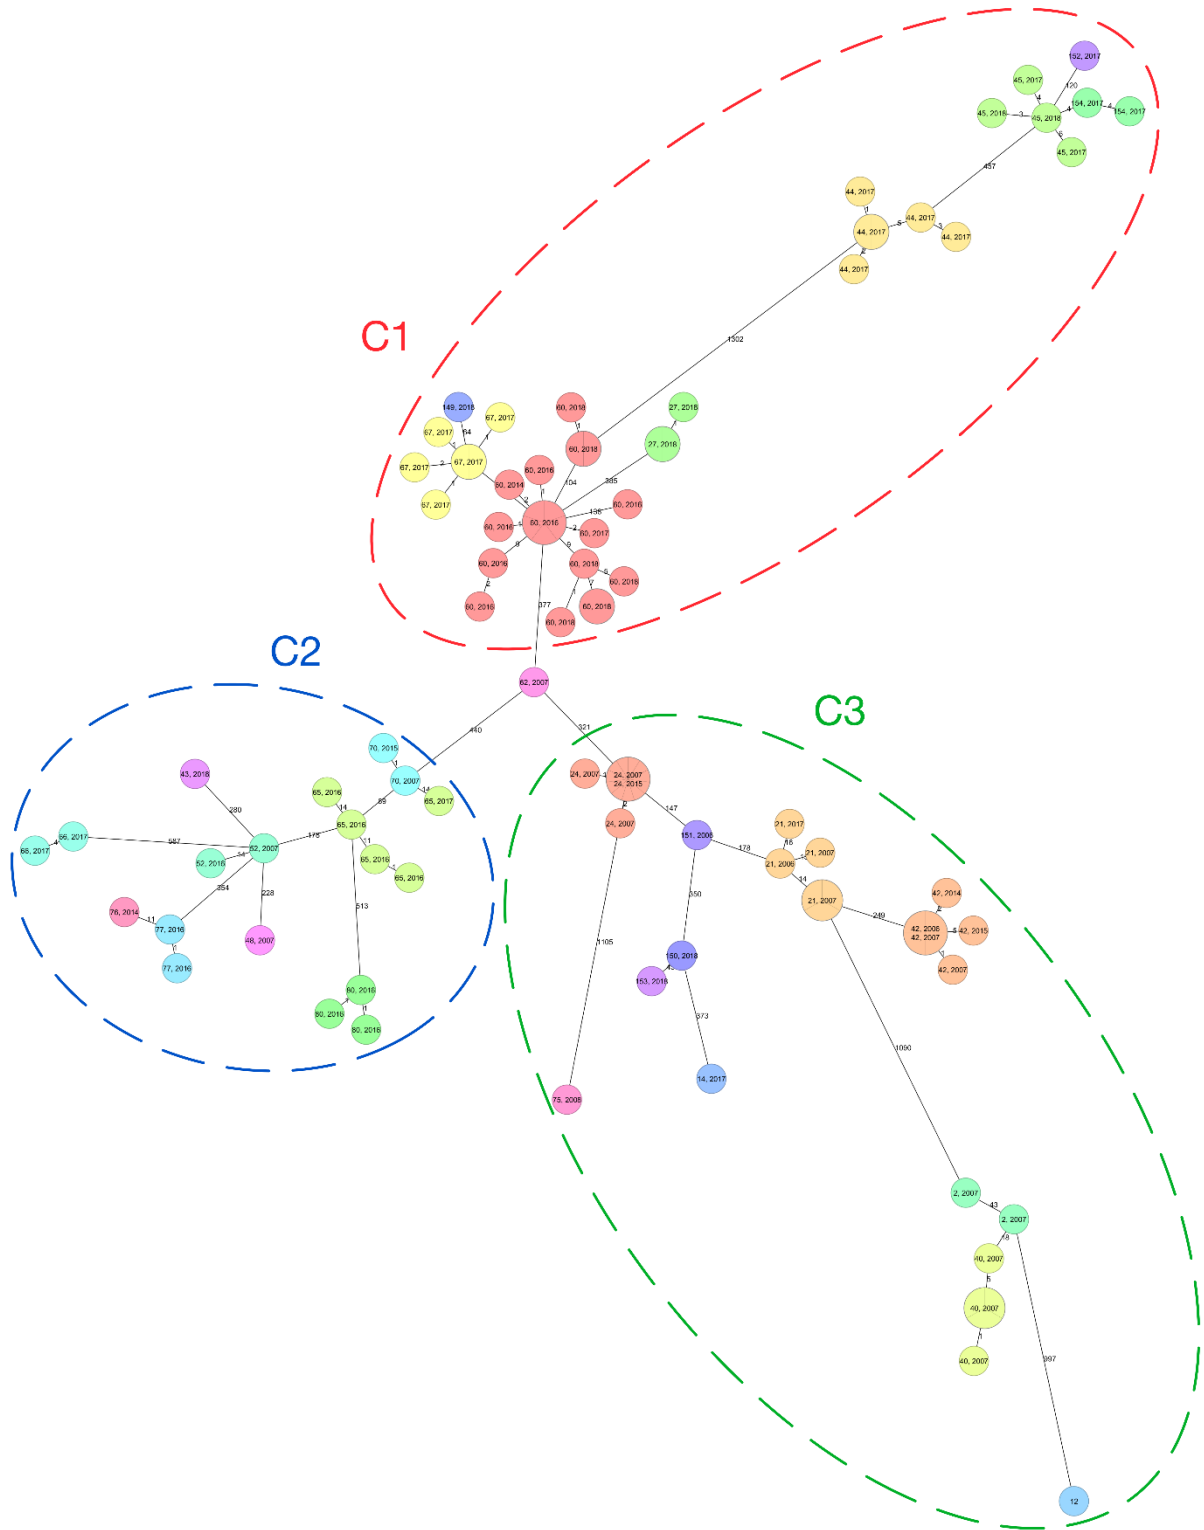

21

22 **Figure S3** Minimum spanning tree of 102 *Mycoplasma bovis* isolates (101 field isolates plus

23 PG45) based on 283 core genome loci, using cgSNV, based on 3,925 SNVs. The clades are

24 indicated by an encompassing circle. The 102 *M. bovis* isolates are identified by MLST sequence  
25 type and production year (ST, Production Year). The nodes are colour coded by the MLST  
26 sequence type. The size of the circle reflects the number of isolates represented, with the  
27 partitioning lines within a circle delineating isolates with an identical genotype. The number of  
28 different alleles is indicated over the line connecting the sequence types.



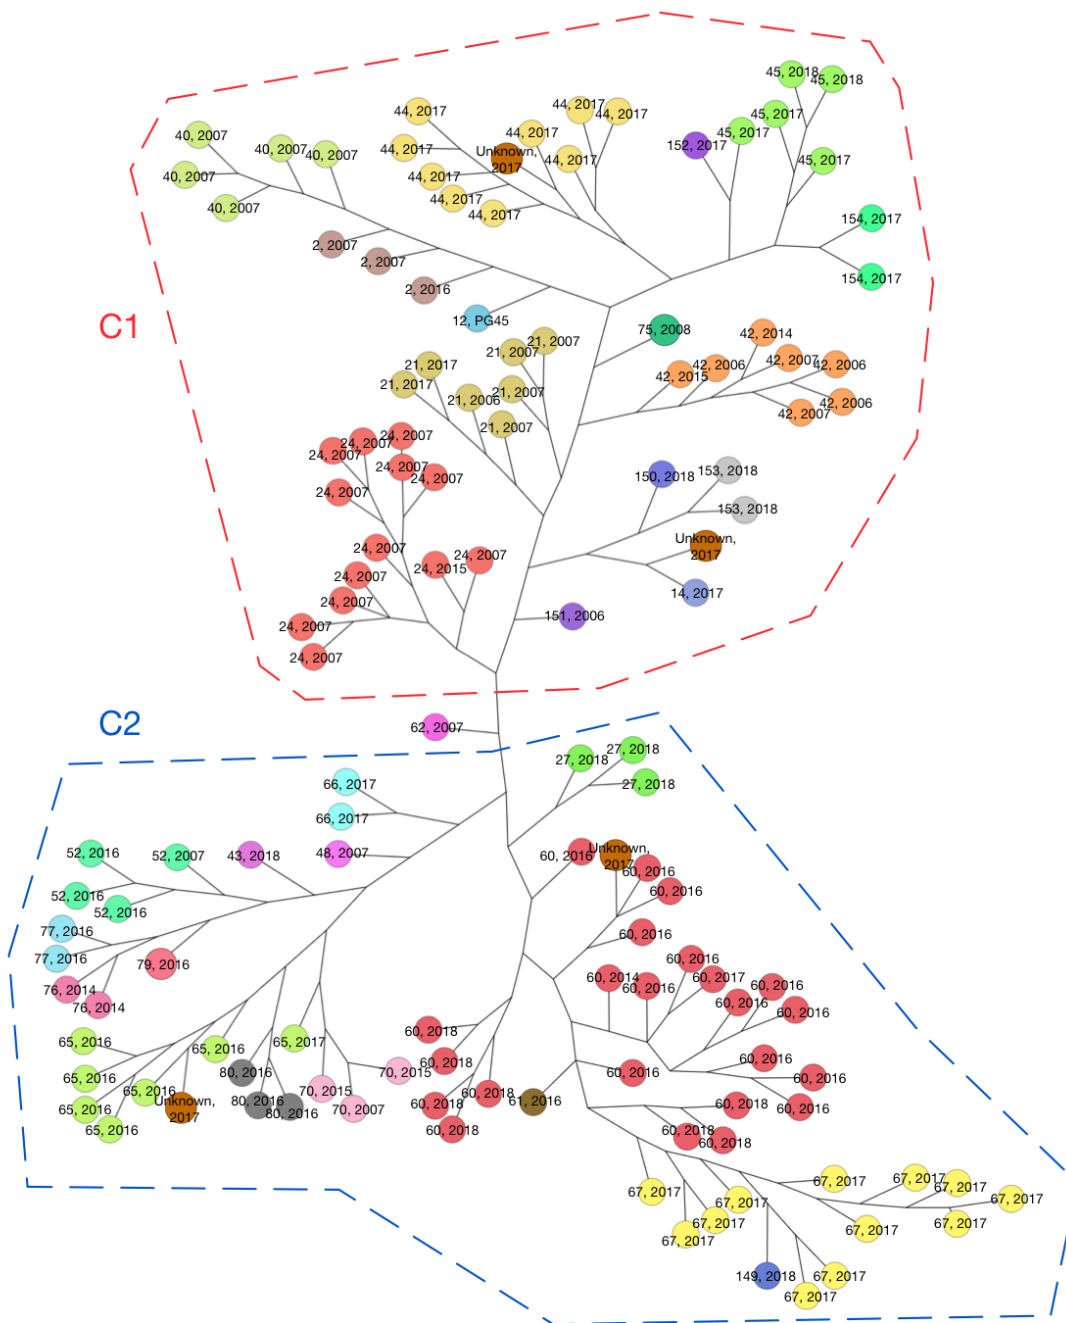

29  
30 **Figure S4** Maximum-likelihood tree of 130 *Mycoplasma bovis* isolates (129 field isolates plus  
31 PG45) based on 14383 SNVs in the core and accessory genomes typed by wgSNV. Clades 1 and  
32 2 are indicated by a surrounding line in red and blue, respectively. The isolates are labelled with

33 MLST sequence type and production year (ST, Production Year), and colour coded with MLST  
34 sequence type. Each individual node represents a single isolate. No two isolates had identical SNV  
35 matrices.
